# Supplementary material for: Design and synthesis of the first triply twisted Möbius annulene
Source: Springer Nature journal article supplement (doi:10.1038/nchem.1955), 2014-05-25
Supplement: 41557_2014_BFnchem1955_MOESM2_ESM.mol [file 41557_2014_BFnchem1955_MOESM2_ESM.mol]

  ChemDraw05011404472D

 72 84  0  0  0  0  0  0  0  0999 V2000
   -2.0737    4.9996    0.0000 C   0  0  0  0  0  0  0  0  0  0  0  0
   -1.6612    4.2852    0.0000 C   0  0  0  0  0  0  0  0  0  0  0  0
   -0.8362    4.2852    0.0000 C   0  0  0  0  0  0  0  0  0  0  0  0
   -0.4237    4.9996    0.0000 C   0  0  0  0  0  0  0  0  0  0  0  0
   -0.8362    5.7141    0.0000 C   0  0  0  0  0  0  0  0  0  0  0  0
   -1.6612    5.7141    0.0000 C   0  0  0  0  0  0  0  0  0  0  0  0
   -2.0737    3.5707    0.0000 C   0  0  0  0  0  0  0  0  0  0  0  0
   -1.6612    2.8562    0.0000 C   0  0  0  0  0  0  0  0  0  0  0  0
   -0.8362    2.8562    0.0000 C   0  0  0  0  0  0  0  0  0  0  0  0
   -0.4237    3.5707    0.0000 C   0  0  0  0  0  0  0  0  0  0  0  0
    0.4013    3.5707    0.0000 C   0  0  0  0  0  0  0  0  0  0  0  0
    0.8135    4.2846    0.0000 C   0  0  0  0  0  0  0  0  0  0  0  0
    0.8135    2.8568    0.0000 C   0  0  0  0  0  0  0  0  0  0  0  0
    1.6378    2.8568    0.0000 C   0  0  0  0  0  0  0  0  0  0  0  0
    2.0500    3.5707    0.0000 C   0  0  0  0  0  0  0  0  0  0  0  0
    1.6378    4.2846    0.0000 C   0  0  0  0  0  0  0  0  0  0  0  0
    2.0500    4.9984    0.0000 C   0  0  0  0  0  0  0  0  0  0  0  0
    1.6378    5.7123    0.0000 C   0  0  0  0  0  0  0  0  0  0  0  0
    0.8135    5.7123    0.0000 C   0  0  0  0  0  0  0  0  0  0  0  0
    0.4013    4.9984    0.0000 C   0  0  0  0  0  0  0  0  0  0  0  0
    0.4010    0.7134    0.0000 C   0  0  0  0  0  0  0  0  0  0  0  0
   -0.4240    0.7134    0.0000 C   0  0  0  0  0  0  0  0  0  0  0  0
    0.8108   -0.0004    0.0000 C   0  0  0  0  0  0  0  0  0  0  0  0
   -0.8339   -0.0004    0.0000 C   0  0  0  0  0  0  0  0  0  0  0  0
    1.2207   -0.7142    0.0000 C   0  0  0  0  0  0  0  0  0  0  0  0
   -1.2391   -0.7142    0.0000 C   0  0  0  0  0  0  0  0  0  0  0  0
   -1.6398   -1.4234    0.0000 C   0  0  0  0  0  0  0  0  0  0  0  0
    1.6306   -1.4234    0.0000 C   0  0  0  0  0  0  0  0  0  0  0  0
   -2.8700   -3.5707    0.0000 C   0  0  0  0  0  0  0  0  0  0  0  0
    2.8700   -3.5661    0.0000 C   0  0  0  0  0  0  0  0  0  0  0  0
   -3.6950   -3.5707    0.0000 C   0  0  0  0  0  0  0  0  0  0  0  0
   -4.1075   -4.2852    0.0000 C   0  0  0  0  0  0  0  0  0  0  0  0
   -3.6950   -4.9996    0.0000 C   0  0  0  0  0  0  0  0  0  0  0  0
   -2.8700   -4.9996    0.0000 C   0  0  0  0  0  0  0  0  0  0  0  0
   -2.4575   -4.2852    0.0000 C   0  0  0  0  0  0  0  0  0  0  0  0
    2.4575   -4.2806    0.0000 C   0  0  0  0  0  0  0  0  0  0  0  0
    2.8700   -4.9950    0.0000 C   0  0  0  0  0  0  0  0  0  0  0  0
    3.6950   -4.9950    0.0000 C   0  0  0  0  0  0  0  0  0  0  0  0
    4.1075   -4.2806    0.0000 C   0  0  0  0  0  0  0  0  0  0  0  0
    3.6950   -3.5661    0.0000 C   0  0  0  0  0  0  0  0  0  0  0  0
   -4.9325   -4.2852    0.0000 C   0  0  0  0  0  0  0  0  0  0  0  0
   -5.3450   -4.9996    0.0000 C   0  0  0  0  0  0  0  0  0  0  0  0
   -4.9325   -5.7141    0.0000 C   0  0  0  0  0  0  0  0  0  0  0  0
   -4.1075   -5.7141    0.0000 C   0  0  0  0  0  0  0  0  0  0  0  0
    4.1075   -5.7095    0.0000 C   0  0  0  0  0  0  0  0  0  0  0  0
    4.9325   -5.7095    0.0000 C   0  0  0  0  0  0  0  0  0  0  0  0
    5.3450   -4.9950    0.0000 C   0  0  0  0  0  0  0  0  0  0  0  0
    4.9325   -4.2806    0.0000 C   0  0  0  0  0  0  0  0  0  0  0  0
   -4.1072   -2.8568    0.0000 C   0  0  0  0  0  0  0  0  0  0  0  0
    4.1072   -2.8522    0.0000 C   0  0  0  0  0  0  0  0  0  0  0  0
   -3.6947   -2.1424    0.0000 C   0  0  0  0  0  0  0  0  0  0  0  0
   -4.1072   -1.4279    0.0000 C   0  0  0  0  0  0  0  0  0  0  0  0
   -4.9322   -1.4279    0.0000 C   0  0  0  0  0  0  0  0  0  0  0  0
   -5.3447   -2.1424    0.0000 C   0  0  0  0  0  0  0  0  0  0  0  0
   -4.9322   -2.8568    0.0000 C   0  0  0  0  0  0  0  0  0  0  0  0
   -6.1697   -2.1424    0.0000 C   0  0  0  0  0  0  0  0  0  0  0  0
   -6.5822   -2.8568    0.0000 C   0  0  0  0  0  0  0  0  0  0  0  0
   -6.1697   -3.5713    0.0000 C   0  0  0  0  0  0  0  0  0  0  0  0
   -5.3447   -3.5713    0.0000 C   0  0  0  0  0  0  0  0  0  0  0  0
    4.9322   -2.8522    0.0000 C   0  0  0  0  0  0  0  0  0  0  0  0
    5.3447   -2.1377    0.0000 C   0  0  0  0  0  0  0  0  0  0  0  0
    4.9322   -1.4233    0.0000 C   0  0  0  0  0  0  0  0  0  0  0  0
    4.1072   -1.4233    0.0000 C   0  0  0  0  0  0  0  0  0  0  0  0
    3.6947   -2.1377    0.0000 C   0  0  0  0  0  0  0  0  0  0  0  0
    5.3447   -3.5667    0.0000 C   0  0  0  0  0  0  0  0  0  0  0  0
    6.1697   -3.5667    0.0000 C   0  0  0  0  0  0  0  0  0  0  0  0
    6.5822   -2.8522    0.0000 C   0  0  0  0  0  0  0  0  0  0  0  0
    6.1697   -2.1377    0.0000 C   0  0  0  0  0  0  0  0  0  0  0  0
   -1.2197   -2.1424    0.0000 C   0  0  0  0  0  0  0  0  0  0  0  0
    1.2197   -2.1377    0.0000 C   0  0  0  0  0  0  0  0  0  0  0  0
   -0.3954   -2.1424    0.0000 C   0  0  0  0  0  0  0  0  0  0  0  0
    0.3954   -2.1377    0.0000 C   0  0  0  0  0  0  0  0  0  0  0  0
  1  2  2  0      
  2  3  1  0      
  3  4  2  0      
  4  5  1  0      
  5  6  2  0      
  6  1  1  0      
  2  7  1  0      
  7  8  2  0      
  8  9  1  0      
  9 10  2  0      
 10  3  1  0      
 10 11  1  0      
 11 12  1  0      
 11 13  2  0      
 13 14  1  0      
 14 15  2  0      
 15 16  1  0      
 16 12  1  0      
 16 17  2  0      
 17 18  1  0      
 18 19  2  0      
 19 20  1  0      
 20 12  2  0      
  9 21  1  0      
 22 13  1  0      
 21 23  3  0      
 22 24  3  0      
 23 25  1  0      
 24 26  1  0      
 26 27  3  0      
 25 28  3  0      
 29 31  2  0      
 31 32  1  0      
 32 33  1  0      
 33 34  1  0      
 34 35  2  0      
 35 29  1  0      
 30 36  1  0      
 36 37  2  0      
 37 38  1  0      
 38 39  1  0      
 39 40  1  0      
 40 30  2  0      
 32 41  2  0      
 41 42  1  0      
 42 43  2  0      
 43 44  1  0      
 44 33  2  0      
 38 45  2  0      
 45 46  1  0      
 46 47  2  0      
 47 48  1  0      
 48 39  2  0      
 31 49  1  0      
 40 50  1  0      
 49 51  2  0      
 51 52  1  0      
 52 53  2  0      
 53 54  1  0      
 54 55  1  0      
 55 49  1  0      
 54 56  2  0      
 56 57  1  0      
 57 58  2  0      
 58 59  1  0      
 59 55  2  0      
 50 60  1  0      
 60 61  1  0      
 61 62  1  0      
 62 63  2  0      
 63 64  1  0      
 64 50  2  0      
 60 65  2  0      
 65 66  1  0      
 66 67  2  0      
 67 68  1  0      
 68 61  2  0      
 27 29  1  0      
 69 71  3  0      
 70 72  3  0      
 71 72  1  0      
 69 51  1  0      
 70 64  1  0      
 30 28  1  0      
M  END
